# Supplementary material
Source: PubMed Central journal article supplement (PMC2773482)
Supplement: blood-2009-06-229211_1.pdf [file blood-2009-06-229211_1.pdf]

|    | Member name            | Affiliation                                                                                                                     |
|----|------------------------|---------------------------------------------------------------------------------------------------------------------------------|
| 1  | Dr. John Gribben       | St. Bartholomew's Hospital, University of London                                                                                |
| 2  | Dr. Carlo Croce        | Department of Molecular Virology, Immunology, and Medical Genetics, Ohio State University                                       |
| 3  | Dr. Thomas J. Kipps,   | Director of the CRC and Director of Research for the Rebecca and John Moores Cancer Center, University of California, San Diego |
| 4  | Dr. Michael Keating    | Anderson Cancer Center, University of Texas Houston                                                                             |
| 5  | Dr. Donna Neuberg      | Dana Faber Cancer Institute, Harvard School of Medicine, Boston                                                                 |
| 6  | Dr. William Plunkett   | Anderson Cancer Center, University of Texas Houston                                                                             |
| 7  | Dr. John Byrd          | Arthur James Cancer Hospital, Ohio State University                                                                             |
| 8  | Dr. John Gibben        | St. Bartholomew's Hospital, University of London                                                                                |
| 9  | Dr. Michael Grever     | Arthur James Cancer Hospital, Ohio State University                                                                             |
| 10 | Dr. Varsha Gandhi      | Anderson Cancer Center, University of Texas Houston                                                                             |
| 11 | Dr. Januario Castro    | Rebecca and John Moore Cancer Center, University of California, San Diego                                                       |
| 12 | Dr. William Wierda     | Anderson Cancer Center, University of Texas Houston                                                                             |
| 13 | Dr. Kanti Rai          | North Shore Long Island Jewish Health System. Division of Hematology/Oncology. New Hyde Park, NY                                |
| 14 | Dr. Neil Kay           | Mayo Clinic, Rochester, Minnesota                                                                                               |
| 15 | Dr. Gordon Dewald,     | Mayo Clinic, Rochester, Minnesota                                                                                               |
| 17 | Dr. Laura Z. Rassenti  | Rebecca and John Moore Cancer Center University of California, San Diego                                                        |
| 18 | Dr. Marie Dell'Aquila, | Division of Medical Genetics, University of California, San Diego                                                               |
