# Supplementary material
Source: PubMed Central journal article supplement (PMC2773482)
Supplement: blood-2009-06-229211_2.pdf [file blood-2009-06-229211_2.pdf]

| <i>p-value</i> <sup>†</sup> | <i>FDR</i> <sup>‡</sup> | <i>class</i><br><i>11q_del</i> | <i>class</i><br><i>13q_del</i> | <i>class</i><br><i>17p_del</i> | <i>class</i><br><i>normal_K</i> | <i>class</i><br><i>Trisomy_12</i> | <i>miRNA</i>       |
|-----------------------------|-------------------------|--------------------------------|--------------------------------|--------------------------------|---------------------------------|-----------------------------------|--------------------|
| < 1e-07                     | < 1e-07                 | 30.55                          | 286.61                         | 213.14                         | 95.06                           | 52.26                             | <i>miR-130a*</i>   |
| 1.00E-07                    | 1.16E-05                | 1803.07                        | 2995.78                        | 239.47                         | 2027.46                         | 1793.99                           | <i>miR-370</i>     |
| 4.60E-06                    | 3.50E-04                | 46.78                          | 313.41                         | 203.03                         | 175.87                          | 34.48                             | <i>miR-640</i>     |
| 6.00E-06                    | 3.50E-04                | 586.84                         | 370.42                         | 16.80                          | 60.84                           | 171.11                            | <i>miR-572</i>     |
| 8.20E-06                    | 3.77E-04                | 4977.43                        | 2103.30                        | 3462.47                        | 3967.74                         | 3695.73                           | <i>miR-556-3p</i>  |
| 9.70E-06                    | 3.77E-04                | 5335.86                        | 3166.92                        | 4355.14                        | 4995.45                         | 5278.31                           | <i>miR-498</i>     |
| 1.24E-05                    | 4.13E-04                | 148.21                         | 376.96                         | 25.80                          | 54.34                           | 109.33                            | <i>miR-590-5p</i>  |
| 1.50E-05                    | 4.37E-04                | 1408.95                        | 2291.78                        | 1618.28                        | 1564.15                         | 1706.68                           | <i>miR-593</i>     |
| 4.58E-05                    | 1.19E-03                | 103.31                         | 288.90                         | 56.76                          | 306.70                          | 308.28                            | <i>miR-151-3p</i>  |
| 5.90E-05                    | 1.33E-03                | 66.12                          | 279.22                         | 324.99                         | 296.37                          | 310.92                            | <i>miR-16-2*</i>   |
| 6.26E-05                    | 1.33E-03                | 1209.64                        | 854.71                         | 1076.46                        | 1312.22                         | 1137.44                           | <i>miR-543</i>     |
| 7.11E-05                    | 1.38E-03                | 233.07                         | 457.09                         | 472.82                         | 308.69                          | 221.46                            | <i>miR-205</i>     |
| 8.56E-05                    | 1.53E-03                | 958.45                         | 648.34                         | 935.25                         | 952.69                          | 918.79                            | <i>miR-377</i>     |
| 7.23E-04                    | 1.20E-02                | 4638.94                        | 6326.70                        | 5874.39                        | 5472.79                         | 4834.53                           | <i>miR-142-5p</i>  |
| 7.91E-04                    | 1.23E-02                | 1027.75                        | 680.59                         | 706.04                         | 748.55                          | 1209.18                           | <i>miR-193a-5p</i> |
| 1.61E-03                    | 2.21E-02                | 658.58                         | 398.76                         | 887.49                         | 791.68                          | 751.88                            | <i>miR-499-5p</i>  |
| 1.62E-03                    | 2.21E-02                | 714.64                         | 664.28                         | 591.64                         | 498.10                          | 555.42                            | <i>miR-185*</i>    |
| 1.70E-03                    | 2.21E-02                | 235.27                         | 222.05                         | 111.68                         | 196.90                          | 361.68                            | <i>miR-29b-1*</i>  |
| 2.09E-03                    | 2.57E-02                | 2718.76                        | 2208.41                        | 1882.36                        | 2469.40                         | 5819.01                           | <i>miR-146a</i>    |
| 2.33E-03                    | 2.62E-02                | 495.01                         | 277.98                         | 445.41                         | 435.39                          | 450.09                            | <i>miR-145</i>     |
| 2.37E-03                    | 2.62E-02                | 1292.18                        | 882.26                         | 1014.62                        | 1041.36                         | 1071.64                           | <i>miR-29a*</i>    |
| 2.62E-03                    | 2.76E-02                | 340.68                         | 474.30                         | 233.64                         | 163.52                          | 146.63                            | <i>miR-99b</i>     |
| 2.73E-03                    | 2.76E-02                | 19.62                          | 81.07                          | 40.47                          | 34.80                           | 32.82                             | <i>miR-127-3p</i>  |
| 3.02E-03                    | 2.90E-02                | 8392.33                        | 5710.04                        | 7035.30                        | 5715.71                         | 8288.99                           | <i>miR-202*</i>    |
| 3.11E-03                    | 2.90E-02                | 178.17                         | 112.99                         | 188.85                         | 75.13                           | 204.54                            | <i>miR-585</i>     |
| 3.79E-03                    | 3.39E-02                | 93.70                          | 84.50                          | 101.25                         | 46.04                           | 32.89                             | <i>miR-631</i>     |
| 3.93E-03                    | 3.39E-02                | 82.62                          | 22.29                          | 49.23                          | 66.69                           | 73.87                             | <i>miR-651</i>     |
| 4.54E-03                    | 3.78E-02                | 125.21                         | 32.41                          | 94.47                          | 112.03                          | 121.32                            | <i>miR-487a</i>    |
| 5.05E-03                    | 4.06E-02                | 9854.98                        | 7010.75                        | 7954.41                        | 8102.69                         | 9518.50                           | <i>miR-371-3p</i>  |
| 5.82E-03                    | 4.40E-02                | 60.10                          | 22.59                          | 27.39                          | 65.28                           | 41.66                             | <i>miR-519e*</i>   |
| 5.85E-03                    | 4.40E-02                | 123.89                         | 318.89                         | 328.04                         | 268.27                          | 149.26                            | <i>miR-516a-5p</i> |
| 6.23E-03                    | 4.41E-02                | 49.19                          | 121.59                         | 161.34                         | 103.60                          | 73.07                             | <i>miR-141</i>     |
| 6.25E-03                    | 4.41E-02                | 229.33                         | 490.95                         | 388.80                         | 478.32                          | 194.62                            | <i>miR-105*</i>    |
| 7.26E-03                    | 4.98E-02                | 12078.61                       | 17239.93                       | 16159.29                       | 12127.53                        | 9328.69                           | <i>miR-565</i>     |
| 8.64E-03                    | 5.75E-02                | 711.25                         | 439.22                         | 510.06                         | 520.62                          | 525.35                            | <i>miR-136</i>     |
| 9.32E-03                    | 5.87E-02                | 162.18                         | 85.42                          | 32.82                          | 77.20                           | 114.42                            | <i>miR-618</i>     |
| 9.48E-03                    | 5.87E-02                | 2662.94                        | 2960.69                        | 2132.43                        | 2507.17                         | 4922.22                           | <i>miR-146b-5p</i> |
| 9.58E-03                    | 5.87E-02                | 155.37                         | 142.06                         | 195.73                         | 121.94                          | 35.50                             | <i>miR-148a</i>    |
| 1.09E-02                    | 6.51E-02                | 8211.45                        | 6335.32                        | 9015.44                        | 7233.33                         | 6253.75                           | <i>miR-574-3p</i>  |
| 1.22E-02                    | 7.10E-02                | 36.20                          | 144.88                         | 31.97                          | 58.37                           | 42.81                             | <i>miR-17*</i>     |
| 1.26E-02                    | 7.17E-02                | 39.69                          | 37.42                          | 35.80                          | 111.02                          | 37.81                             | <i>miR-629</i>     |
| 1.35E-02                    | 7.32E-02                | 991.46                         | 716.62                         | 779.06                         | 881.96                          | 850.46                            | <i>miR-876-5p</i>  |
| 1.35E-02                    | 7.32E-02                | 364.10                         | 356.53                         | 455.63                         | 498.56                          | 293.74                            | <i>miR-532-3p</i>  |
| 1.44E-02                    | 7.62E-02                | 121.27                         | 286.94                         | 91.69                          | 76.21                           | 166.59                            | <i>miR-200c</i>    |
| 1.67E-02                    | 8.62E-02                | 543.64                         | 362.57                         | 359.47                         | 430.39                          | 499.74                            | <i>miR-34a</i>     |
| 1.77E-02                    | 8.80E-02                | 395.69                         | 183.20                         | 148.31                         | 139.05                          | 190.16                            | <i>miR-548a-3p</i> |
| 1.78E-02                    | 8.80E-02                | 32770.73                       | 47178.51                       | 31256.93                       | 40311.84                        | 26685.84                          | <i>miR-223</i>     |
| 1.92E-02                    | 9.28E-02                | 1522.47                        | 1357.44                        | 1554.70                        | 1317.04                         | 1233.28                           | <i>miR-634</i>     |
| 1.95E-02                    | 9.28E-02                | 690.84                         | 443.89                         | 569.50                         | 594.22                          | 605.66                            | <i>miR-602</i>     |
| 2.08E-02                    | 9.69E-02                | 182.04                         | 241.88                         | 43.24                          | 121.28                          | 200.41                            | <i>miR-367</i>     |
| 2.24E-02                    | 1.02E-01                | 35980.39                       | 28152.30                       | 33924.07                       | 32949.78                        | 36478.40                          | <i>miR-92a</i>     |

| <i>p-value</i> <sup>†</sup> | <i>FDR</i> <sup>‡</sup> | <i>class</i><br><i>11q_del</i> | <i>class</i><br><i>13q_del</i> | <i>class</i><br><i>17p_del</i> | <i>class</i><br><i>normal_K</i> | <i>class</i><br><i>Trisomy_12</i> | <i>miRNA</i>        |
|-----------------------------|-------------------------|--------------------------------|--------------------------------|--------------------------------|---------------------------------|-----------------------------------|---------------------|
| 2.33E-02                    | 1.03E-01                | 3275.30                        | 3715.31                        | 4086.69                        | 2623.44                         | 3659.38                           | <i>miR-566</i>      |
| 2.35E-02                    | 1.03E-01                | 310.55                         | 259.92                         | 194.89                         | 297.13                          | 272.83                            | <i>miR-198</i>      |
| 2.44E-02                    | 1.05E-01                | 196.97                         | 307.09                         | 248.62                         | 83.25                           | 285.12                            | <i>miR-219-2-3p</i> |
| 2.55E-02                    | 1.08E-01                | 3659.55                        | 3900.81                        | 5052.32                        | 5088.79                         | 5087.66                           | <i>let-7c</i>       |
| 2.59E-02                    | 1.08E-01                | 7224.53                        | 7470.79                        | 6547.12                        | 7232.21                         | 5529.39                           | <i>miR-103</i>      |
| 2.78E-02                    | 1.14E-01                | 1019.55                        | 463.05                         | 1030.76                        | 908.52                          | 950.05                            | <i>miR-32</i>       |
| 2.91E-02                    | 1.17E-01                | 5264.39                        | 7998.55                        | 5484.53                        | 7934.05                         | 7408.76                           | <i>miR-29b</i>      |
| 3.04E-02                    | 1.19E-01                | 1830.50                        | 2286.95                        | 1448.81                        | 1698.70                         | 1822.39                           | <i>miR-31</i>       |
| 3.09E-02                    | 1.19E-01                | 158.67                         | 112.85                         | 295.63                         | 242.62                          | 194.50                            | <i>miR-668</i>      |
| 3.12E-02                    | 1.19E-01                | 3954.93                        | 5240.03                        | 3412.26                        | 5399.70                         | 4816.60                           | <i>miR-29c</i>      |
| 3.36E-02                    | 1.26E-01                | 53100.22                       | 41736.93                       | 52065.69                       | 47985.09                        | 37844.57                          | <i>miR-155</i>      |
| 3.45E-02                    | 1.28E-01                | 2424.08                        | 1579.87                        | 2668.28                        | 1977.87                         | 2632.78                           | <i>miR-604</i>      |
| 4.30E-02                    | 1.57E-01                | 73.40                          | 35.77                          | 73.31                          | 182.91                          | 108.70                            | <i>miR-136*</i>     |
| 4.41E-02                    | 1.58E-01                | 3850.54                        | 4012.17                        | 4686.87                        | 4714.73                         | 4861.85                           | <i>let-7b</i>       |

<sup>†</sup>*p-value* reported are the results of class the “Comparison among groups” analysis of microRNA expression patterns from 62 samples with different karyotypes by using Biometric Research Branch (BRB) array tool version 3.6.0.

<sup>‡</sup>*FDR*= False discovery Rate.

The values reported in columns 3,4,5,6,7 represent the gometric means of the intensity of the different cytogenetic groups calculated by class comparison among groups. Analysis was performed by using BRB array tool.
