# Supplementary material
Source: PubMed Central journal article supplement (PMC2773482)
Supplement: blood-2009-06-229211_3.pdf [file blood-2009-06-229211_3.pdf]

| Class Comparison analysis               | <i>miRNAs down-regulated</i> |                                |                      | <i>miRNAs up-regulated</i> |                                |                      |
|-----------------------------------------|------------------------------|--------------------------------|----------------------|----------------------------|--------------------------------|----------------------|
|                                         | <i>miRNA</i>                 | <i>Fold change<sup>‡</sup></i> | <i>P<sup>†</sup></i> | <i>miRNA</i>               | <i>Fold change<sup>‡</sup></i> | <i>P<sup>†</sup></i> |
| 11q deletion CLLs vs. all of other CLLs | <i>miR-16-2*</i>             | 0.22                           | 6.0E-07              | <i>miR-572</i>             | 6.1                            | 8.60E-03             |
|                                         | <i>miR-130a*</i>             | 0.25                           | 3.6E-04              | <i>miR-548a-3p</i>         | 2.37                           | 1.30E-03             |
|                                         | <i>miR-127-3p</i>            | 0.46                           | 1.2E-02              | <i>miR-556-3p</i>          | 1.53                           | 5.00E-03             |
|                                         | <i>miR-141</i>               | 0.46                           | 9.2E-03              | <i>miR-136</i>             | 1.42                           | 1.10E-03             |
|                                         | <i>miR-516a-5p</i>           | 0.51                           | 2.7E-02              | <i>miR-34a</i>             | 1.3                            | 4.80E-02             |
|                                         | <i>miR-29b</i>               | 0.74                           | 4.5E-02              | <i>miR-29a*</i>            | 1.28                           | 1.50E-03             |
|                                         | <i>let-7c</i>                | 0.77                           | 2.6E-02              | <i>miR-185*</i>            | 1.25                           | 8.70E-03             |
|                                         | <i>let-7a</i>                | 0.78                           | 4.6E-02              | <i>miR-876-5p</i>          | 1.23                           | 1.30E-02             |
|                                         | <i>miR-593</i>               | 0.80                           | 1.1E-02              |                            |                                |                      |
|                                         | <i>miR-142-5p</i>            | 0.84                           | 2.4E-02              |                            |                                |                      |
|                                         | <i>let-7b</i>                | 0.84                           | 3.8E-02              |                            |                                |                      |
| 17p deletion CLLs vs. all of other CLLs | <i>miR-572</i>               | 0.08                           | 1.9E-05              | <i>miR-130a*</i>           | 2.59                           | 7.00E-03             |
|                                         | <i>miR-370</i>               | 0.11                           | < 1e-07              | <i>let-7b*</i>             | 2.11                           | 2.40E-02             |
|                                         | <i>miR-590-5p</i>            | 0.19                           | 2.2E-04              | <i>miR-141</i>             | 1.94                           | 1.20E-02             |
|                                         | <i>miR-151-3p</i>            | 0.23                           | 3.4E-05              | <i>miR-631</i>             | 1.87                           | 4.40E-02             |
|                                         | <i>miR-367</i>               | 0.23                           | 1.4E-03              | <i>miR-668</i>             | 1.72                           | 3.50E-02             |
|                                         | <i>miR-618</i>               | 0.32                           | 1.1E-03              | <i>miR-205</i>             | 1.64                           | 5.10E-03             |
|                                         | <i>miR-29b-1*</i>            | 0.43                           | 6.6E-04              | <i>miR-574-3p</i>          | 1.32                           | 6.40E-03             |
|                                         | <i>miR-146a</i>              | 0.57                           | 4.6E-02              | <i>miR-593*</i>            | 1.3                            | 4.60E-02             |
|                                         | <i>miR-146b-5p</i>           | 0.64                           | 4.4E-02              | <i>miR-139-3p</i>          | 1.3                            | 4.50E-02             |
|                                         | <i>miR-198</i>               | 0.69                           | 1.7E-03              | <i>miR-30d</i>             | 1.27                           | 7.60E-03             |
|                                         | <i>miR-29c</i>               | 0.70                           | 7.4E-03              | <i>miR-30a</i>             | 1.26                           | 3.50E-02             |
|                                         | <i>miR-29b</i>               | 0.76                           | 4.5E-02              | <i>miR-629*</i>            | 1.22                           | 2.80E-02             |
|                                         | <i>miR-31</i>                | 0.76                           | 1.7E-02              | <i>miR-634</i>             | 1.17                           | 2.10E-02             |
|                                         | <i>miR-320</i>               | 0.79                           | 8.1E-03              | <i>miR-138-1*</i>          | 1.13                           | 3.50E-02             |
|                                         | <i>miR-26a</i>               | 0.84                           | 3.7E-02              |                            |                                |                      |
| trisomy 12 CLLs vs. all of other CLLs   | <i>miR-640</i>               | 0.21                           | 4.8E-05              | <i>miR-146a</i>            | 2.57                           | 6.6E-05              |
|                                         | <i>miR-148a</i>              | 0.23                           | 3.2E-04              | <i>miR-151-3p</i>          | 2.02                           | 3.4E-02              |
|                                         | <i>miR-125b-2*</i>           | 0.39                           | 6.6E-03              | <i>miR-29b-1*</i>          | 2.00                           | 1.6E-03              |
|                                         | <i>miR-625*</i>              | 0.40                           | 2.9E-02              | <i>miR-146b-5p</i>         | 1.94                           | 5.2E-04              |
|                                         | <i>miR-130a*</i>             | 0.41                           | 4.5E-03              | <i>miR-589*</i>            | 1.91                           | 3.1E-02              |
|                                         | <i>miR-631</i>               | 0.42                           | 1.3E-03              | <i>miR-340</i>             | 1.69                           | 2.8E-02              |
|                                         | <i>miR-105*</i>              | 0.50                           | 3.1E-03              | <i>miR-585</i>             | 1.59                           | 3.5E-02              |
|                                         | <i>miR-99b</i>               | 0.52                           | 1.2E-02              | <i>miR-193a-5p</i>         | 1.58                           | 2.8E-04              |
|                                         | <i>miR-608</i>               | 0.54                           | 4.5E-02              | <i>miR-486-5p</i>          | 1.34                           | 3.4E-02              |
|                                         | <i>miR-92a-1*</i>            | 0.58                           | 1.8E-02              | <i>miR-222</i>             | 1.28                           | 2.0E-02              |
|                                         | <i>miR-516a-5p</i>           | 0.59                           | 2.6E-02              | <i>miR-202*</i>            | 1.27                           | 1.4E-02              |
|                                         | <i>miR-205</i>               | 0.61                           | 1.4E-03              | <i>miR-498</i>             | 1.23                           | 2.1E-02              |
|                                         | <i>miR-565</i>               | 0.65                           | 2.4E-03              | <i>miR-26a</i>             | 1.21                           | 9.3E-03              |
|                                         | <i>miR-193b</i>              | 0.67                           | 1.4E-02              | <i>miR-371-3p</i>          | 1.18                           | 2.5E-02              |
|                                         | <i>miR-532-3p</i>            | 0.71                           | 5.5E-03              |                            |                                |                      |
|                                         | <i>miR-223</i>               | 0.71                           | 1.2E-02              |                            |                                |                      |
|                                         | <i>miR-30c</i>               | 0.78                           | 2.1E-02              |                            |                                |                      |
|                                         | <i>miR-103</i>               | 0.78                           | 1.8E-03              |                            |                                |                      |
|                                         | <i>miR-155</i>               | 0.78                           | 1.0E-02              |                            |                                |                      |
|                                         | <i>miR-107</i>               | 0.80                           | 8.7E-03              |                            |                                |                      |
| <i>miR-30a</i>                          | 0.81                         | 2.7E-02                        |                      |                            |                                |                      |
| <i>miR-574-3p</i>                       | 0.82                         | 3.4E-02                        |                      |                            |                                |                      |

| <i>Class Comparison analysis</i>       | <i>miRNA</i>        | <i>Fold change</i> <sup>‡</sup> | <i>P</i> <sup>†</sup> | <i>miRNA</i>      | <i>Fold change</i> <sup>‡</sup> | <i>P</i> <sup>†</sup> |
|----------------------------------------|---------------------|---------------------------------|-----------------------|-------------------|---------------------------------|-----------------------|
|                                        | <i>miR-483-3p</i>   | 0.84                            | 4.4E-02               |                   |                                 |                       |
|                                        | <i>miR-142-5p</i>   | 0.86                            | 1.5E-02               |                   |                                 |                       |
|                                        | <i>miR-197</i>      | 0.86                            | 2.9E-02               |                   |                                 |                       |
|                                        | <i>miR-634</i>      | 0.86                            | 1.2E-02               |                   |                                 |                       |
| 13q deletion CLLs vs. all of other CLL | <i>miR-487a</i>     | 0.29                            | 1.2E-04               | <i>miR-590-5p</i> | 5.43                            | 1.4E-04               |
|                                        | <i>miR-651</i>      | 0.33                            | 2.3E-04               | <i>miR-640</i>    | 3.86                            | 2.4E-03               |
|                                        | <i>miR-136*</i>     | 0.35                            | 1.2E-02               | <i>miR-572</i>    | 3.84                            | 3.0E-02               |
|                                        | <i>miR-32</i>       | 0.48                            | 9.6E-04               | <i>miR-130a*</i>  | 3.75                            | 1.1E-04               |
|                                        | <i>miR-519e*</i>    | 0.51                            | 1.2E-02               | <i>miR-17*</i>    | 3.50                            | 7.9E-04               |
|                                        | <i>miR-499-5p</i>   | 0.52                            | 7.1E-05               | <i>miR-126*</i>   | 2.87                            | 4.6E-02               |
|                                        | <i>miR-668</i>      | 0.52                            | 9.4E-03               | <i>miR-370</i>    | 2.66                            | 1.6E-02               |
|                                        | <i>miR-556-3p</i>   | 0.54                            | 1.3E-06               | <i>miR-181c</i>   | 2.58                            | 3.4E-02               |
|                                        | <i>miR-363*</i>     | 0.57                            | 4.9E-02               | <i>miR-127-3p</i> | 2.55                            | 5.5E-04               |
|                                        | <i>miR-340</i>      | 0.58                            | 4.6E-02               | <i>miR-200c</i>   | 2.52                            | 5.5E-03               |
|                                        | <i>miR-557</i>      | 0.59                            | 3.1E-02               | <i>miR-99b</i>    | 2.41                            | 2.0E-03               |
|                                        | <i>miR-145</i>      | 0.61                            | 5.5E-05               | <i>miR-185</i>    | 1.72                            | 3.6E-02               |
|                                        | <i>miR-498</i>      | 0.64                            | 8.0E-07               | <i>miR-205</i>    | 1.58                            | 1.1E-02               |
|                                        | <i>miR-604</i>      | 0.65                            | 6.0E-03               | <i>miR-223</i>    | 1.49                            | 9.5E-03               |
|                                        | <i>miR-16</i>       | 0.65                            | 1.5E-02               | <i>miR-565</i>    | 1.45                            | 2.3E-02               |
|                                        | <i>miR-377</i>      | 0.69                            | 9.0E-07               | <i>miR-593</i>    | 1.44                            | 1.5E-06               |
|                                        | <i>miR-543</i>      | 0.73                            | 1.3E-05               | <i>miR-31</i>     | 1.35                            | 8.1E-03               |
|                                        | <i>miR-602</i>      | 0.73                            | 1.8E-03               | <i>miR-30b*</i>   | 1.28                            | 3.5E-03               |
|                                        | <i>miR-193a-5p</i>  | 0.74                            | 3.8E-02               | <i>miR-142-5p</i> | 1.22                            | 3.1E-03               |
|                                        | <i>miR-96</i>       | 0.75                            | 4.1E-02               |                   |                                 |                       |
|                                        | <i>miR-202*</i>     | 0.78                            | 2.2E-02               |                   |                                 |                       |
|                                        | <i>miR-371-3p</i>   | 0.79                            | 4.8E-03               |                   |                                 |                       |
|                                        | <i>miR-136</i>      | 0.80                            | 2.2E-02               |                   |                                 |                       |
|                                        | <i>miR-92a</i>      | 0.81                            | 1.9E-03               |                   |                                 |                       |
|                                        | <i>miR-29a*</i>     | 0.81                            | 3.2E-03               |                   |                                 |                       |
|                                        | <i>miR-632</i>      | 0.83                            | 1.1E-02               |                   |                                 |                       |
|                                        | <i>miR-876-5p</i>   | 0.83                            | 1.2E-02               |                   |                                 |                       |
|                                        | <i>miR-629*</i>     | 0.84                            | 4.7E-02               |                   |                                 |                       |
|                                        | <i>miR-92b</i>      | 0.85                            | 4.4E-02               |                   |                                 |                       |
| normal k. CLLs vs. all of other CLLs   | <i>miR-219-2-3p</i> | 0.32                            | 1.3E-03               | <i>miR-629</i>    | 2.96                            | 3.1E-04               |
|                                        | <i>miR-98</i>       | 0.42                            | 2.4E-02               | <i>miR-136*</i>   | 2.59                            | 3.1E-02               |
|                                        | <i>miR-585</i>      | 0.44                            | 1.1E-03               | <i>miR-187</i>    | 1.94                            | 2.3E-02               |
|                                        | <i>miR-200c</i>     | 0.49                            | 4.1E-02               | <i>miR-519e*</i>  | 1.88                            | 2.5E-02               |
|                                        | <i>miR-769-3p</i>   | 0.50                            | 2.5E-02               | <i>miR-532-3p</i> | 1.40                            | 2.2E-02               |
|                                        | <i>miR-765</i>      | 0.51                            | 3.7E-02               | <i>miR-191</i>    | 1.24                            | 3.2E-02               |
|                                        | <i>miR-185</i>      | 0.54                            | 2.0E-02               | <i>miR-543</i>    | 1.24                            | 6.5E-03               |
|                                        | <i>miR-601</i>      | 0.59                            | 9.0E-03               |                   |                                 |                       |
|                                        | <i>miR-566</i>      | 0.71                            | 2.5E-03               |                   |                                 |                       |
|                                        | <i>miR-202*</i>     | 0.78                            | 3.1E-02               |                   |                                 |                       |
|                                        | <i>miR-744*</i>     | 0.79                            | 1.2E-02               |                   |                                 |                       |
|                                        | <i>miR-185*</i>     | 0.81                            | 5.7E-03               |                   |                                 |                       |

<sup>‡</sup>*Fold change* is the fold-ratio of geometric means of microRNA expressions between one karyotype and all of the others considered as two classes.

<sup>†</sup>*P* (p-value) and fold change are the results of the “Class Comparison” analysis within BRB-Array tool.
