# Supplementary material
Source: PubMed Central journal article supplement (PMC2773482)
Supplement: blood-2009-06-229211_4.pdf [file blood-2009-06-229211_4.pdf]

| <b>Samples No.</b> | <b>13q_del positive cells (%)<sup>†</sup></b> | <b>17p_del positive cells (%)<sup>†</sup></b> | <b>Trisomy_12 positive cells (%)<sup>†</sup></b> | <b><i>IGHV</i> homology (%)</b> | <b>ZAP-70 positive cells (%)</b> |
|--------------------|-----------------------------------------------|-----------------------------------------------|--------------------------------------------------|---------------------------------|----------------------------------|
| 3                  | 98.5                                          | -                                             | -                                                | < 98%                           | < 20%                            |
| 1                  | 19                                            | 39.5                                          | -                                                | ≥ 98%                           | > 20%                            |
| 9                  | 15                                            | 11.5                                          | -                                                | < 98%                           | < 20%                            |
| 5                  | -                                             | -                                             | 59.5                                             | ≥ 98%                           | > 20%                            |
| 11                 | -                                             | -                                             | 60                                               | < 98%                           | < 20%                            |

<sup>†</sup>The values represent the median of the percentage of the positive cells from the samples of the same cytogenetic group.
